# Supplementary material for: Artificial Intelligence in Dental Education: A Scoping Review of Opportunities, Challenges, and Ethical Frameworks for Shaping Accreditation Standards and Future Practice
Source: Research Square preprint supplement (doi:10.21203/rs.3.rs-6498214/v1), 2025-05-05
Supplement: Supplementary file 1 [file 61f3b1fcfe390a6e6faf0637.docx]

**Appendix 2: Critical appraisal of included studies:**

| **Study (Author, Year)** | **Design** | **Risk of Bias** | **Strengths** | **Weaknesses** |
| --- | --- | --- | --- | --- |
| Brondani et al. (2024) | Mixed-Methods | Moderate | Thematic synthesis, multicenter data | Subjective coding, no protocol registration |
| Fang et al. (2024) | Randomized Trial | Low | Blinded assessment, preregistered protocol | Small sample size (n=86) |
| Chang et al. (2024) | Randomized Trial | High | Novel AI-dental integration tested | No control group, subjective outcomes |
| Schopp et al. (2024) | Cross-Sectional | Moderate | Large sample (n=384), validated survey | Self-reported data, regional bias (Egypt only) |
| Johnsen and Marchini (2024) | Perspective | N/A | Expert insights, ethical framework proposed | No primary data, theoretical focus |
| Saghiri et al. (2022) | Scoping Review | Low | Comprehensive synthesis, PRISMA-ScR adherence | Limited critical appraisal of included studies |
| Islam et al. (2022) | Review Framework Proposal | N/A | Practical roadmap for AI adoption | Lacks empirical validation |
| Ali et al. (2024) | Cross-Sectional | High | Direct comparison (AI vs. students) | Single-institution, short follow-up |
| Al-Zubaidi et al. (2024) | Qualitative | Moderate | Multicenter design (4 countries) | Low response rate (58%) |
| Aldowah et al. (2024) | Cross-Sectional | Moderate | Focus on faculty readiness | Convenience sampling, self-selection bias |
| Ayan et al. (2024) | Experimental | High | AI vs. student diagnostic accuracy tested | Homogeneous dataset (European radiographs only) |
| Bahadir et al. (2024) | Comparative | Moderate | Blinded evaluators, standardized metrics | Small sample (n=55), no longitudinal data |
| Busch et al. (2024) | Cross-Sectional | Low | Large global sample (n=596), diverse regions | Self-reported perceptions, no objective outcomes |
| Dascalu et al. (2024) | Comparative | High | AI-initiated second opinions explored | No patient outcomes, theoretical framework |
| Elchaghaby and Wahby (2025) | Cross-Sectional | Moderate | Focus on Egyptian dental students | Single-center, limited generalizability |
| Elnagar et al. (2024) | Review | N/A | Highlights ethical implications of ChatGPT | No primary data, narrow scope (admissions only) |
| Fitzek and Choi (2024) | Cross-Sectional | Moderate | German-speaking cohort, robust statistical tests | Sampling bias (convenience), no qualitative data |
| Gowdar et al. (2024) | Cross-Sectional | High | Focus on AI awareness in Saudi Arabia | Small sample (n=100), self-reported knowledge |
| Guler et al. (2024) | Cross-Sectional | Moderate | Craniomaxillofacial surgery focus | Single-institution, subjective attitudes measured |
| Hammoudi Halat et al. (2024) | Cross-Sectional | Moderate | AI readiness assessed across domains | Self-reported competency, no skill-based assessment |
| Hegde et al. (2024) | Cross-Sectional | Low | Australian cohort, validated survey tool | Limited qualitative insights |
| Hultgren et al. (2023) | Cross-Sectional | Moderate | ChatGPT vs. teachers compared | Small sample (n=109), short-term outcomes |
| Kim et al. (2023) | Perspective | N/A | Ethical integration guidelines proposed | Lacks implementation data |
| Künzle and Paris (2024) | Comparative | High | LLM performance on dental exams tested | Narrow scope (restorative/endodontics only) |
| Li et al. (2025) | Cross-Sectional | Moderate | Periodontal surgery concepts tested | Single-institution, AI model not validated |
| Lin et al. (2024) | Cross-Sectional | Moderate | Ethical perceptions of AI in decision-making | Cultural bias (Malaysian students only) |
| Mahrous et al. (2023) | Comparative | Low | Game-based AI tool tested | Small sample (n=73), short-term engagement |
| Ozbey and Yasa (2025) | Cross-Sectional | Moderate | Personality traits and AI perceptions linked | Self-reported data, no causal inference |
| Qamar et al. (2024) | Cross-Sectional | High | ChatGPT adoption in Pakistan explored | Convenience sampling, subjective effectiveness |
| Qutieshat et al. (2024) | Mixed-method | Moderate | AI vs. students in endodontics | Single-center, limited clinical relevance |
| Ramezanzade et al. (2023) | Comparative | High | AI predicts pulp exposure preexcavation | Retrospective data, no clinical validation |
| Rampf et al. (2024) | Randomized Trial | Low | AI feedback vs. traditional methods compared | Blinded evaluators, standardized metrics |
| Roganovic (2024) | Mixed-method | Moderate | ChatGPT familiarity and learning outcomes | Self-selection bias, short-term assessment |
| Saravia‐Rojas et al. (2024) | Cross-sectional | High | ChatGPT in academic writing tested | No plagiarism detection software used |
| Schoenhof et al. (2024) | Comparative | Moderate | Synthetic radiographs validated | Limited clinical applicability |
| Schropp et al. (2024) | Comparative | Low | AI-assisted caries detection | Multicenter, validated reference standards |
| Stephan et al. (2024) | Comparative | Moderate | AI-generated radiology reports tested | Subjective readability assessment |
| Tadinada et al. (2023) | Perspective | N/A | Roadmap for agile curriculum design | Theoretical, lacks empirical testing |
| Thurzo et al. (2023) | Scoping Review | Low | Comprehensive AI integration review | Limited focus on low-resource settings |
| Uribe et al. (2025) | Scoping review | Moderate | Generative AI in dental education | Thematic bias (focus on high-income institutions) |
| Yilmaz et al. (2024) | Cross-Sectional | High | Turkish student perceptions of AI | Small specialty student sample (n=62) |
| Amiri et al. (2024) | Systematic Review | Low | Meta-analysis of attitudes across disciplines | Heterogeneous study designs |
